# Supplementary material for: Tuning the layer-dependent doping effect of graphenes by C60
Source: Royal Society of Chemistry journal article supplement (doi:10.1039/c3nr02055j), 2013-01-01
Supplement: c3nr02055j.pdf [file c3nr02055j.pdf]

## Tuning the layer-dependent doping effect of graphenes by C<sub>60</sub>

Minjiang Chen,<sup>ab</sup> Haiqing Zhou,<sup>ab</sup> Fang Yu,<sup>ac</sup> Huaichao Yang,<sup>ab</sup> Gang Wang,<sup>ab</sup>  
Jun He,<sup>\*a</sup> Lianfeng Sun<sup>\*a</sup>

<sup>a</sup> National Centre for Nanoscience and Technology, Beijing 100190, China. E-mail:  
slf@nanoctr.cn; hej@nanoctr.cn; Fax: +8610-62656765; Tel: +8610-82545617

<sup>b</sup> University of Chinese Academy of Sciences, Beijing 100049, China

<sup>c</sup> Academy for Advanced Interdisciplinary Studies, Peking University, Beijing 100871,  
China

### *Supplementary Contents*

- I.** Experimental conditions and Preparations of the hybrids
- II.** Raman spectra of C<sub>60</sub> powder
- III.** Raman spectra of pristine graphenes
- IV.** Analysis of Raman spectra of C<sub>60</sub>/G hybrid with different thickness of C<sub>60</sub> film
- V.** Comparison of Raman spectra between pristine graphene and C<sub>60</sub>/G hybrid
- VI.** Calculation of doping level for C<sub>60</sub>/MG, C<sub>60</sub>/BG and C<sub>60</sub>/TG hybrids
- VII.** Comparison of Raman spectra between pristine graphene and C<sub>60</sub>/G hybrid after anneal

## I. Experimental conditions and Preparations of the hybrids

The graphenes were prepared with the micromechanical cleavage of natural graphite (Alfa Aesar) by using Scotch transparent tape 600 (3M) onto 300 nm SiO<sub>2</sub>/Si substrate. The fullerene-functionalization of graphene was operated by vacuum thermal evaporator. Fullerene powder (Alfa Aesar) was put in evaporation boat heating by current. The rate of the deposition, measured by a thickness monitor, was 0.5 Å/s. The vacuum was kept at 10<sup>-4</sup> Pa. For C<sub>60</sub>/G hybrid, graphenes are exfoliated upon substrate firstly, followed with the deposition of C<sub>60</sub>. For G/C<sub>60</sub> hybrid, C<sub>60</sub> are firstly deposited on substrate via thermal evaporation, and then graphenes are exfoliated upon C<sub>60</sub>-Si substrate via micromechanical cleavage.

Layer number of graphenes in the two kinds of hybrids can be preliminarily confirmed by optical microscope technique, which has been widely used in the determination of pristine graphene layer number. Compared with the hybrids with bilayer or trilayer graphenes, hybrids with monolayer graphene have the lowest contrast compared with the substrate, as shown in Fig. S1. The color of the hybrids becomes darker with the increase of graphene layer number.

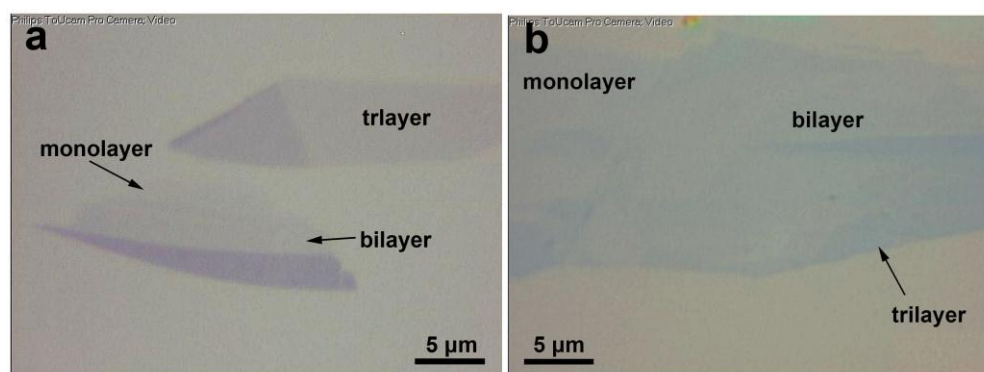

Fig. S1 Optical images of (a) C<sub>60</sub>/G hybrid and (b) G/C<sub>60</sub> hybrid.

The micro-Raman spectroscopy (Renishaw in Via Raman Spectroscopy) experiments were performed under ambient conditions with 514.5 nm excitation from an argon ion laser. The laser power on the samples was ~ 0.1 mW to avoid laser

induced heating and destroy, and the size of the spot is  $\sim 1\ \mu\text{m}$ .

A vacuum thermal evaporator was also employed to anneal the samples which were located on the middle of the molybdenum boat heating up by current. The high vacuum was kept for 10 min after the annealing process in order to protect graphene from oxidation.

## II. Raman spectra of C60 powders

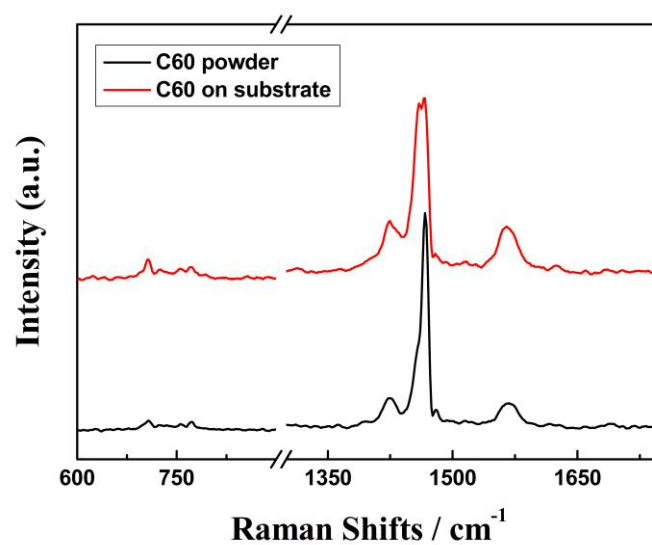

Fig. S2 Raman spectra of fullerene powder and fullerenes deposited on SiO<sub>2</sub>/Si substrate

### III. Raman spectra of pristine graphenes

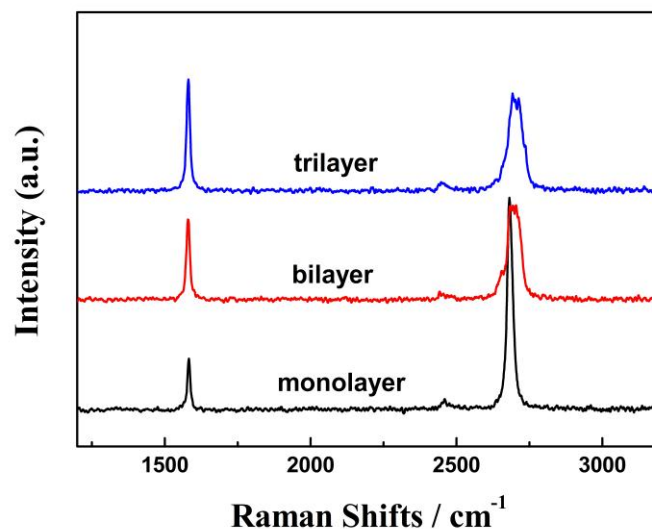

Fig. S3 Raman spectra of pristine  $n$ -layer graphenes

### IV. Analysis of Raman spectra of $\text{C}_{60}$ /G hybrid with different thickness of $\text{C}_{60}$ film

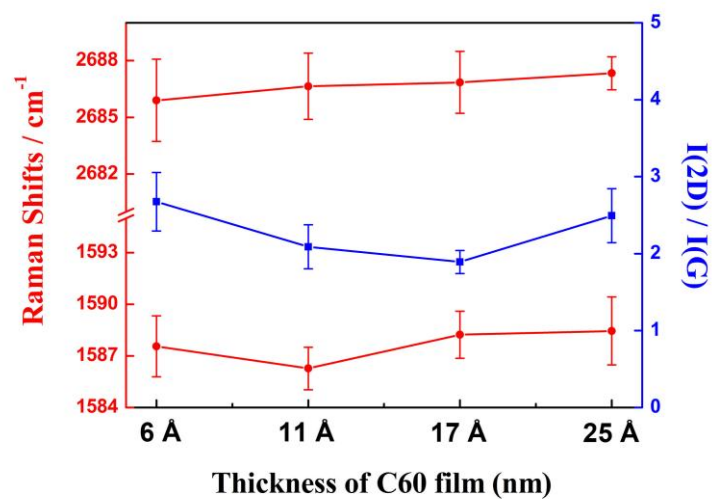

Fig. S4 G, 2D peak positions and peak intensity ratio ( $I(2D)/I(G)$ ) of  $\text{C}_{60}$ /G hybrid with different thickness of  $\text{C}_{60}$  film.

## V. Comparison of Raman spectra between pristine graphene and C<sub>60</sub>/G hybrid

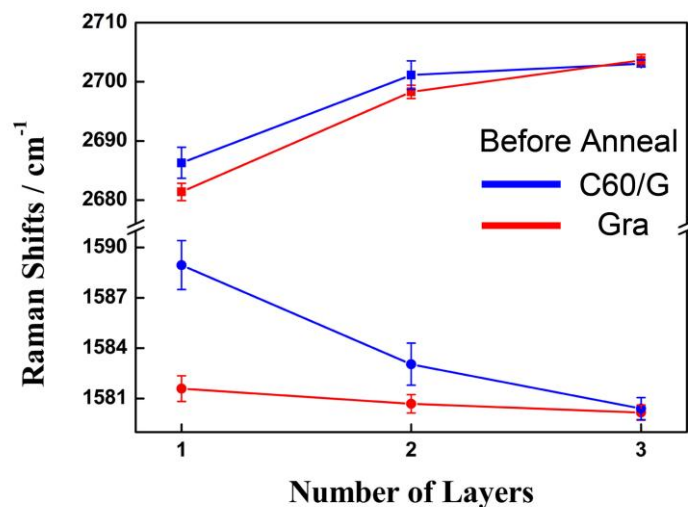

Fig. S5 G and 2D peak positions of pristine  $n$ -layer graphene and C<sub>60</sub>/G hybrid with  $n$ -layer graphene ( $n = 1, 2, 3$ )

## VI. Calculation of doping level for C<sub>60</sub>/MG, C<sub>60</sub>/BG and C<sub>60</sub>/TG hybrids

Based on the previous work about monitoring dopants by Raman scattering,<sup>1, 2</sup> electron density ( $n$ ) and Fermi energy ( $E_F$ ) shift of  $n$ -layer graphenes could be estimated from the Raman shifts of G, 2D bands and intensity ratio of  $I(2D)/I(G)$ .

After C<sub>60</sub> molecules decoration, red Raman shift of G peaks for C<sub>60</sub>/MG, C<sub>60</sub>/BG and C<sub>60</sub>/TG hybrids are  $\sim 7.4 \text{ cm}^{-1}$ ,  $\sim 2.4 \text{ cm}^{-1}$  and  $\sim 0.8 \text{ cm}^{-1}$ , respectively. According to the G-peak position varying with electron concentration, Raman shifts of G peak ( $\sim 7.4 \text{ cm}^{-1}$ ,  $\sim 2.4 \text{ cm}^{-1}$  and  $\sim 0.8 \text{ cm}^{-1}$ ) are equivalent to about  $-6.2 \times 10^{12} \text{ cm}^{-2}$ ,  $-4.5 \times 10^{12} \text{ cm}^{-2}$  and  $-2.4 \times 10^{12} \text{ cm}^{-2}$  electron concentration, respectively. The minus signs indicate that the dopants for graphene are holes. Moreover, the Fermi energy in graphene changes as  $E_F(n) = \hbar |v_F| \sqrt{\pi n}$ , where  $|v_F|$  is the Fermi velocity.<sup>3, 4</sup> With the value of electron concentration estimated above, the Dirac points move to the valence band about 3.2 meV, 2.7 meV and 0.5 meV for graphene in C<sub>60</sub>/MG, C<sub>60</sub>/BG and C<sub>60</sub>/TG hybrids, respectively.

## VII. Comparison of Raman spectra between pristine graphene and C<sub>60</sub>/G hybrid after anneal

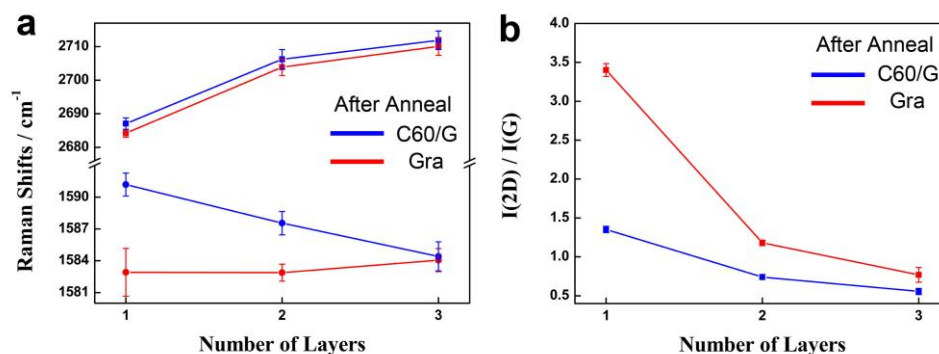

Fig. S6 G, 2D peak positions and peak intensity ratio ( $I(2D)/I(G)$ ) of pristine graphene and C<sub>60</sub>/G hybrid after anneal.

1. A. Das, S. Pisana, B. Chakraborty, S. Piscanec, S. K. Saha, U. V. Waghmare, K. S. Novoselov, H. R. Krishnamurthy, A. K. Geim, A. C. Ferrari and A. K. Sood, *Nat. Nanotechnol.*, 2008, **3**, 210-215.
2. H. Q. Zhou, F. Yu, H. C. Yang, C. Y. Qiu, M. J. Chen, L. J. Hu, Y. J. Guo, H. F. Yang, C. Z. Gu, L. F. Sun, *Chem. Commun.*, 2011, **47**, 9408-9410.
3. K. S. Novoselov, A. K. Geim, S. V. Morozov, D. Jiang, M. I. Katsnelson, I. V. Grigorieva, S. V. Dubonos, A. A. Firsov, *Nature*, 2005, **438**, 197-200.
4. Y. B. Zhang, Y. W. Tan, H. L. Stormer, P. Kim, *Nature*, 2005, **438**, 201-204.
